# Supplementary figures and images for: Attention Deficit Hyperactivity Disorder in Children and Adults: A Population Survey on Public Beliefs
Source: PubMed Central journal article supplement — J Atten Disord. 2019 Jul 4;25(6):783–93. doi: 10.1177/1087054719855691 (PMC7897776; doi:10.1177/1087054719855691), 2019-07-04

Supp.  
Figure 1

Child vignette

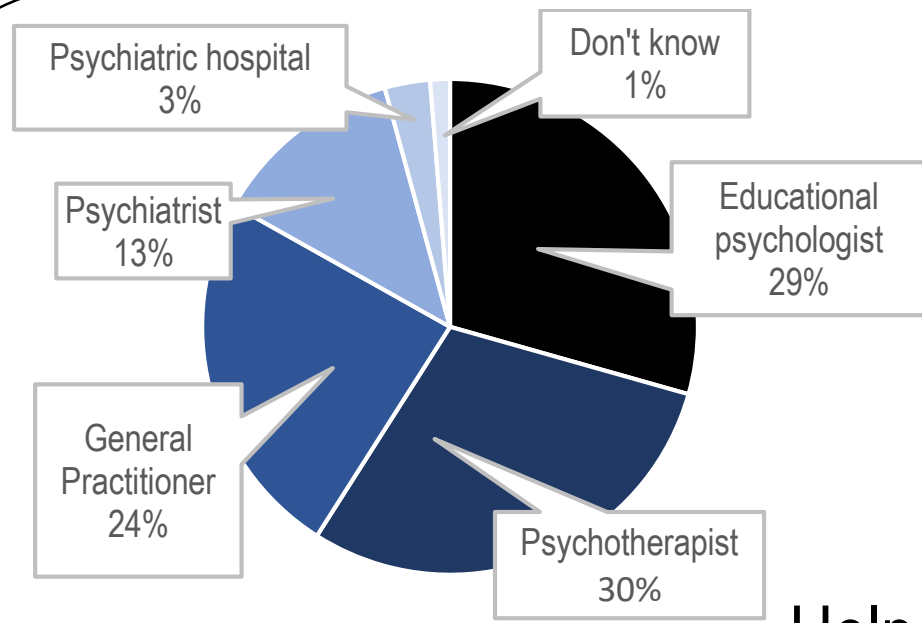

Help-seeking

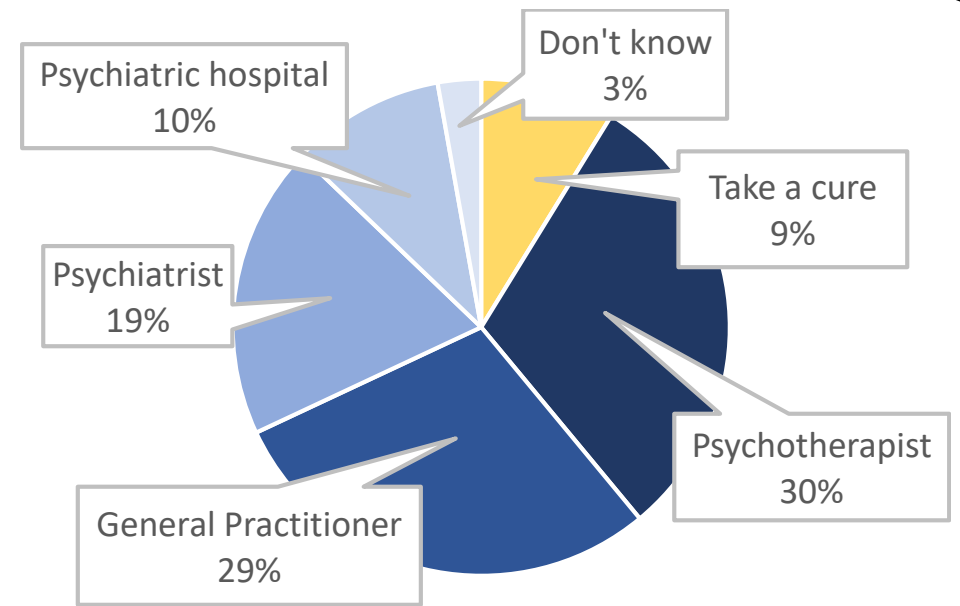

Adult vignette

Treatment

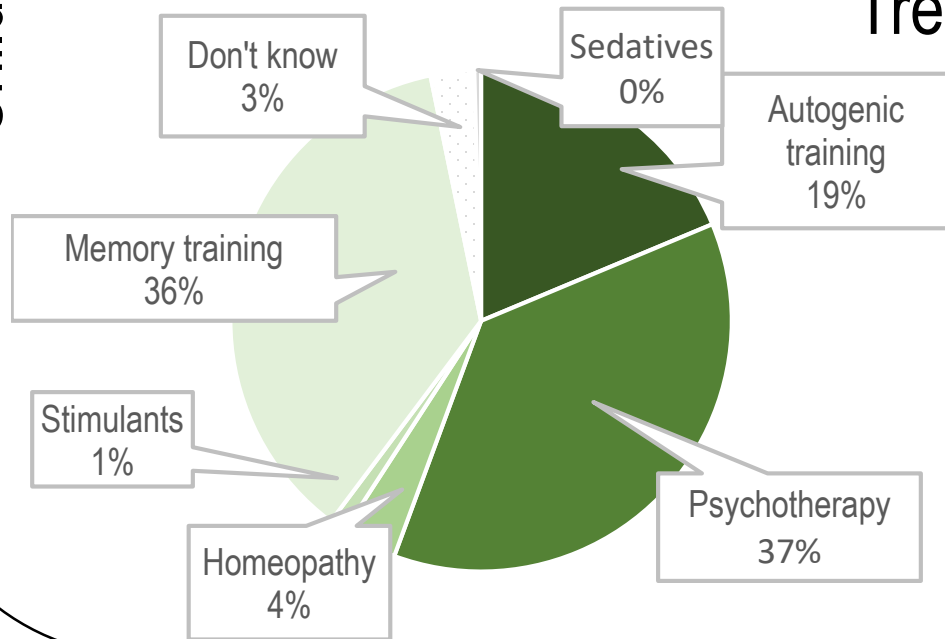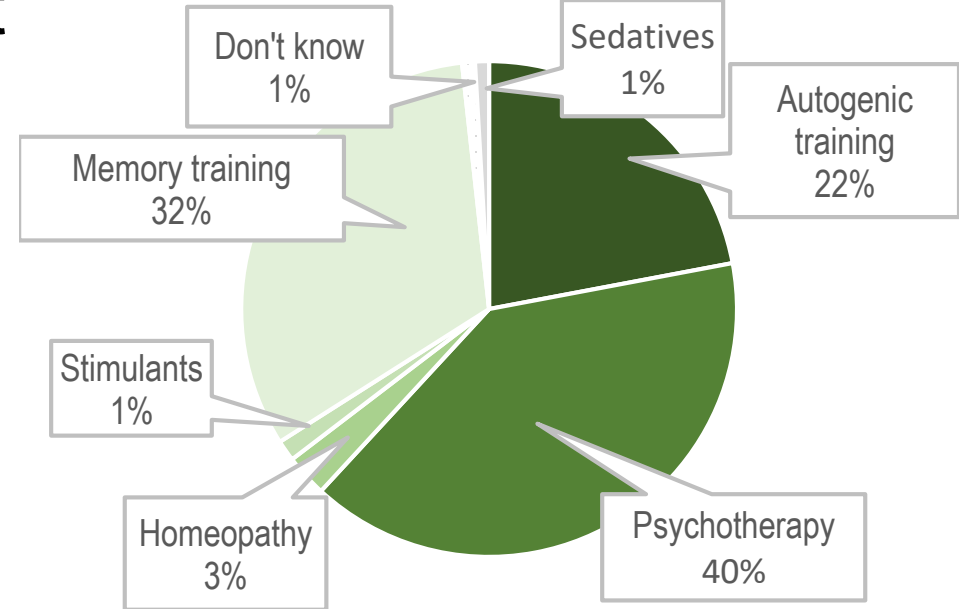

Supplement: Supplementary_Figure1.pdf [file Supplementary_Figure1.pdf]
